# Supplementary material
Source: PubMed Central journal article supplement (PMC4678821)
Supplement: supp_gkv1180_nar-02970-h-2015-File007.pdf [file supp_gkv1180_nar-02970-h-2015-File007.pdf]

Supplemental Table S1: Mini-casposon integration sites in pUC19

| For mini-casposon with LE30/RE30:                 | Integration site |
|---------------------------------------------------|------------------|
| GAGTGAGCTAACTCACATTAATTGCGTTGCGCTCACTGCCCGCTTTC   | 589 (+)          |
| ATGACGGTGAAAACCTCTGACACATGCAGCTCCCGGAGACGGTCAC    | 44 (+)           |
| CATGCAGCTCCCGGAGACGGTCACAGCTTGTCTGTAAGCGGATGCCG   | 67 (+)           |
| ACTATGCGGCATCAGAGCAGATTGTAAGTGCAGAGTGCACCATATGCG  | 173 (+)          |
| ACGAAACGCGCGAGACGAAAGGGCCTCGTGATACGCCTATTTTTAT    | 2669 (-)         |
| TTAATGTGAGTTAGCTCACTCATTAGGCACCCAGGCTTTACACTT     | 550 (-)          |
| TTTACACTTTATGCTTCCGGCTCGTATGTTGTGTGGAATTGTGAGC    | 513 (-)          |
| CGCGGAACCCCTATTTGTTTATTTTTCTAAATACATTCAAATATGTA   | 2560 (-)         |
| ACACTTTATGCTTCCGGCTCGTATGTTGTGTGGAATTGTGAGCGGA    | 510 (-)          |
| TTGCTGGCCTTTTGTCTCACATGTTCTTTCCTGCGTTATCCCCTGAT   | 798 (-)          |
| TCAGGGCGCGTCAGCGGGTGTGGCGGGTGTGCGGGCTGGCTTAAC     | 129 (+)          |
| GATGAGCACTTTTAAAGTTTGTGCTATGTGGCGCGGTATTATCCCCT   | 2259 (-)         |
| TGCATGTGTCAGAGGTTTTCACCGTCATCACCGAAACGCGCGAGAC    | 12 (-)           |
| ATCTGCTCTGATGCCGCATAGTTAAGCCAGCCCCGACACCCGCCAAC   | 135 (-)          |
| GGGAGCTGCATGTGTCAGAGGTTTTCACCGTCATCACCGAAACGCG    | 19 (-)           |
| TACCGCCTTTGAGTGAGCTGATACCGCTCGCCGAGCCGAACGACCG    | 734 (-)          |
| CTTACGCATCTGTGCGGTATTTACACCGCATATGGTGCCTCTCAG     | 186 (-)          |
| GTGGGTCTCGCGGTATCATTGCAGCACTGGGGCCAGATGGTAAGCCC   | 1743 (-)         |
| TAACCGTATTACCGCCTTTGAGTGAGCTGATACCGCTCGCCGCAGCC   | 743 (-)          |
| AAAGTGCCACCTGACGTCTAAGAAACCATTATTATCATGACATTAAC   | 2634 (+)         |
| GTTTTCCAGTCACGACGTTGTAAACGACGGCCAGTGAATTCGAG      | 387 (+)          |
|                                                   |                  |
| For mini-casposon with LE15/RE15:                 |                  |
| CTCTAGAGGATCCCCGGTACCGAGCTCGAATTCCTGCGCGTCGTT     | 398 (-)          |
| TAATGTCATGATAATAATGGTTTCTTAGACGTCAGGTGGCACTTTTC   | 2618 (-)         |
| ACTTTATGCTTCCGGCTCGTATGTTGTGTGGAATTGTGAGCGGATAA   | 507 (-)          |
| CCTTTCGCCAGCTGGCGTAATAGCGAAGAGGCCCGCACCGATCGCC    | 289 (-)          |
| CTTCAATAATATTGAAAAAGGAAGAGTATGAGTATTCAACATTTCCG   | 2482 (-)         |
| TGATCTTTTCTACGGGGTCTGACGCTCAGTGAACGAAAACCTCACGT   | 1495 (+)         |
| TTCATTAATGCAGCTGGCAGCAGGTTTCCCGACTGGAAAGCGGGC     | 612 (-)          |
| ATCCGCTTACAGACAAGCTGTGACCGTCTCCGGGAGCTGCATGTGT    | 50 (-)           |
| TATTACGCCAGCTGGCGAA-GGGGGATGTGCTGCAAGGCGATTAAGT   | 327 (+)          |
| AGGAAGAGTATGAGTATTCAACATTTCCGTGTCGCCCTTATTCCCT    | 2465 (-)         |
| CGCGAGACGAAAGGGCCTCGTGATACGCCTATTTTTATAGGTTAATG   | 2660 (-)         |
| TGAGATTATCAAAAAGGATCTTCACCTAGATCCTTTTAAATTAAAA    | 1557 (+)         |
| TGCGGTATTTACACCCGCATATGGTGCCTCTCAGTACAATCTGCT     | 175 (-)          |
| TCAGGGCGCGTCAGCGGGTGTGGCGGGTGTGCGGGCTGGCTTAAC     | 129 (+)          |
| CTCCCCGCGGTTGGCCGATTCAATTAATGCAGCTGGCACGACAGGTT   | 631 (-)          |
| TTCAACATTTCCGTGTGCGCCCTTATCCCTTTTTTGGCGCATTTTGC   | 2448 (-)         |
| CTGTTGAGATCCAGTTTCGATGTAACCCACTCGTGCACCCAACCTGATC | 2364 (+)         |
| TTGATAATCTCATGACCAAAATCCCTTAACGTGAGTTTTCGTTCCAC   | 1509 (-)         |
| CGCGCGGGGAGAGGCGGTTTGGCGTATTGGGCGCTCTTCCGCTTCCT   | 680 (+)          |
| GTAATAGCGAAGAGGCCCGCACCGATCGCCCTTCCAACAGTTGCG     | 273 (-)          |

Integration site is defined as the bp in pUC19 to which the casposon LE 5'-G (i.e., top strand in Fig. 1B) is joined. The bases in red indicate imperfect integration events: in the first case, the TSD sequence flanking the LE and the RE differed at the indicated bp, and in the second, both TSDs are missing a single bp of pUC19 sequence.
